# Supplementary material for: Use of long-term underwater camera surveillance to assess the effects of the largest Amazonian hydroelectric dam on fish communities
Source: PubMed Central journal article supplement — Sci Rep. 2024 Sep 27;14:22366. doi: 10.1038/s41598-024-70636-8 (PMC11436748; doi:10.1038/s41598-024-70636-8), 2024-09-27
Supplement: 41598_2024_70636_MOESM1_ESM.pdf [file 41598_2024_70636_MOESM1_ESM.pdf]

# Unveiling the impacts of the Largest Amazonian Hydropower Endeavor on fish communities through long-term underwater cameras surveillance

Kurt Schmid<sup>1,2,3</sup>, Friedrich Wolfgang Keppeler<sup>1,4</sup>, Fabio Renan Miranda da Silva<sup>1</sup>, Jhully Helen da Silva Santos<sup>1</sup>, Simone Franceschini<sup>5</sup>, Jakob Brodersen<sup>2</sup>, Tommaso Russo<sup>8</sup>, José Amorim Reis-Filho<sup>1,6,7,\*</sup>, Tommaso Giarrizzo<sup>1,9</sup>

## Appendix A. Supplementary data

**Table S1**

Number of Baited Remote Underwater Video (BRUV) systems deployed in each year, sector, and habitat.

| Year | Upstream |        | Main reservoir |        | Reduced flow |        | Downstream |        |
|------|----------|--------|----------------|--------|--------------|--------|------------|--------|
|      | Beaches  | Rapids | Beaches        | Rapids | Beaches      | Rapids | Beaches    | Rapids |
| 2014 | 10       | 10     | 10             | 10     | 10           | 10     | 10         | 5      |
| 2015 | 10       | 10     | 9              | 8      | 10           | 7      | 10         | 5      |
| 2016 | 9        | 9      | 5              | 1      | 10           | 10     | 10         | 5      |
| 2017 | 9        | 9      | 5              | 0      | 9            | 9      | 10         | 5      |
| 2018 | 7        | 10     | 7              | 0      | 11           | 9      | 10         | 5      |
| 2019 | 6        | 10     | 6              | 0      | 10           | 10     | 9          | 5      |
| 2020 | 10       | 10     | 0              | 1      | 8            | 9      | 10         | 5      |

**Table S2**

Model structure of the spatial-temporal models used to fit  $\alpha$ -diversity (richness), MaxN (proxy for abundance),  $\beta$ -diversity, turnover, nestedness,  $\gamma$ -diversity, local contribution to  $\beta$ -diversity (LCBD), and environmental condition data. The code presented in the “fixed and random effects” column follows the syntax structure of the mgcv R package (Wood 2017). Distance = Distance to the Pimental dam.

| <b>Response variable</b>              | <b>Fixed and random effects</b>                                                                                                                  | <b>Distribution</b> |
|---------------------------------------|--------------------------------------------------------------------------------------------------------------------------------------------------|---------------------|
| $\alpha$ -diversity<br>(Richness)     | te(Year, Distance, bs=c("tp", "tp"), k=c(7,8), m=2) + te(Year, Distance, by=Habitat, bs=c("tp", "tp"), k=c(7,8), m=1) + s(Habitat, bs="re", k=2) | Poisson             |
| MaxN                                  | te(Year, Distance, bs=c("tp", "tp"), k=c(7,8), m=2) + te(Year, Distance, by=Habitat, bs=c("tp", "tp"), k=c(7,8), m=1) + s(Habitat, bs="re", k=2) | Negative binomial   |
| $\beta$ -diversity<br>(Ružička index) | s(Year, k=7, bs="tp", m=2) + s(Habitat, k=2, bs="re")                                                                                            | Gaussian            |
| Turnover                              | s(Year, k=7, bs="tp", m=2) + s(Habitat, k=2, bs="re")                                                                                            | Gaussian            |
| Nestedness                            | s(Year, k=7, bs="tp", m=2) + s(Habitat, k=2, bs="re")                                                                                            | Gaussian            |
| $\gamma$ -diversity                   | s(Year, k=7, bs="tp", m=2) + s(Habitat, k=2, bs="re")                                                                                            | Poisson             |
| LCBD                                  | te(Year, Distance, bs=c("tp", "tp"), k=c(7,8), m=2) + te(Year, Distance, by=Habitat, bs=c("tp", "tp"), k=c(7,8), m=1) + s(Habitat, bs="re", k=2) | Gaussian            |
| Environmental conditions              | te(Year, Distance, bs=c("tp", "tp"), k=c(5, 6))                                                                                                  | Gaussian/Poisson    |

**Table S3**

Principal component (PCA) scores of the physical-chemical and hydrological variables. The total variation explained by each one of the first three PCA axes is provided in parenthesis.

**Physical-Chemical variables**

|                  | PC1 (41%) | PC2 (28%) | PC3 (23%) |
|------------------|-----------|-----------|-----------|
| Conductivity     | 2.22      | -2.12     | 0.48      |
| Turbidity        | 3.01      | 0.06      | 0.42      |
| Dissolved oxygen | -1.22     | -2.62     | -1.38     |
| pH               | -1.44     | -0.94     | 2.77      |

**Hydrological parameters**

|                                   | PC1 (73%) | PC2 (18%) | PC3 (7%) |
|-----------------------------------|-----------|-----------|----------|
| Mean monthly flow                 | -2.31     | -1.96     | 0.56     |
| Lowest flow recorded in the year  | -2.68     | -1.36     | -0.61    |
| Highest flow recorded in the year | -2.71     | 1.1       | -0.86    |
| Annual rate of flow increase      | -2.59     | 1.09      | 1.3      |
| Length of the wet season          | -2.9      | 0.82      | -0.24    |

**Table S4**

Summary of the Hierarchical Generalized Additive Models (HGAM) created to explain fish  $\alpha$ -diversity (richness), MaxN (proxy for abundance),  $\beta$ -diversity, turnover, nestedness,  $\gamma$ -diversity, local contribution to  $\beta$ -diversity (LCBD), and the environmental variables. The code presented in the “smooth function” column follows the syntax structure of the mgcv R package (Wood 2017).  
 \*Full model from Table 1. Distance= Distance to the Pimental dam, Hidrol.PC1= PC1 - Hydrological parameters, Water.PC1= PC1 – Physical-chemical parameters

| Model                 | Smooth functions           | edf   | Ref. df | Stat   | Stat value | Significance | Adj. R2 |
|-----------------------|----------------------------|-------|---------|--------|------------|--------------|---------|
| $\alpha$ -diversity   | te(Year, Distance)         | 11.37 | 14.67   | Chi.sq | 55.67      | <0.001       | 0.60    |
|                       | te(Year, Distance):Beach   | 5.38  | 54.00   | Chi.sq | 25.00      | <0.001       |         |
|                       | te(Year, Distance):Rapids  | 15.27 | 41.00   | Chi.sq | 37.47      | <0.001       |         |
|                       | s(Habitat)                 | 0.99  | 1.00    | Chi.sq | 87.57      | <0.001       |         |
| $\alpha$ -diversity * | s(Hidrol.PC1)              | 4.48  | 5.44    | Chi.sq | 26.12      | <0.001       | 0.50    |
|                       | s(Water.PC1)               | 4.77  | 5.78    | Chi.sq | 17.34      | =0.007       |         |
|                       | s(Fishery yield)           | 2.55  | 3.08    | Chi.sq | 4.06       | =0.23        |         |
|                       | s(Mei)                     | 1.00  | 1.00    | Chi.sq | 4.20       | =0.04        |         |
|                       | s(Year)                    | 1.00  | 1.00    | Chi.sq | 64.15      | <0.001       |         |
|                       | s(Distance)                | 3.96  | 4.64    | Chi.sq | 12.57      | =0.01        |         |
|                       | s(Habitat)                 | 0.99  | 1.00    | Chi.sq | 101.26     | <0.001       |         |
| MaxN                  | te(Year, Distance)         | 6.97  | 7.51    | Chi.sq | 20.95      | =0.006       | 0.62    |
|                       | te(Year, Distance):Beach   | 31.03 | 52.00   | Chi.sq | 162.33     | <0.001       |         |
|                       | te(Year, Distance):Rapids  | 27.91 | 41.00   | Chi.sq | 126.14     | <0.001       |         |
|                       | s(Habitat)                 | 0.95  | 1.00    | Chi.sq | 20.33      | <0.001       |         |
| MaxN*                 | s(Hidrol.PC1)              | 6.354 | 7.511   | Chi.sq | 32.854     | <0.001       | 0.43    |
|                       | s(Water.PC1)               | 7.111 | 8.453   | Chi.sq | 91.286     | <0.001       |         |
|                       | s(Fishery yield)           | 1.74  | 2.11    | Chi.sq | 3.995      | =0.12        |         |
|                       | s(Mei)                     | 1     | 1       | Chi.sq | 0.033      | =0.85        |         |
|                       | s(Year)                    | 1     | 1       | Chi.sq | 51.193     | <0.001       |         |
|                       | s(Distance)                | 5.451 | 5.809   | Chi.sq | 132.933    | <0.001       |         |
|                       | s(Habitat)                 | 0.915 | 1       | Chi.sq | 10.783     | <0.001       |         |
| $\beta$ -diversity    | s(Year)                    | 1.27  | 1.49    | F      | 9.04       | =0.01        | 0.53    |
|                       | s(Habitat)                 | 0.76  | 1.00    | F      | 3.22       | =0.06        |         |
| Turnover              | s(Year)                    | 1.00  | 1.00    | F      | 1.82       | =0.20        | 0.06    |
|                       | s(Habitat)                 | 0.00  | 1.00    | F      | 0.00       | =0.84        |         |
| Nestedness            | s(Year)                    | 1.00  | 1.00    | F      | 1.82       | =0.20        | 0.06    |
|                       | s(Habitat)                 | 0.00  | 1.00    | F      | 0.00       | =0.84        |         |
| $\gamma$ -diversity   | s(Year, k=7, bs="tp", m=2) | 1.00  | 1.00    | Chi.sq | 6.50       | =0.01        | 0.57    |
|                       | s(Habitat, k=2, bs="re")   | 0.00  | 1.00    | Chi.sq | 0.00       | =0.67        |         |
| LCBD                  | te(Year,Distance)          | 4.83  | 5.77    | F      | 3.37       | =0.006       | 0.23    |

| <b>Model</b>                      | <b>Smooth functions</b>    | <b>edf</b> | <b>Ref. df</b> | <b>Stat</b> | <b>Stat value</b> | <b>Significance</b> | <b>Adj. R2</b> |
|-----------------------------------|----------------------------|------------|----------------|-------------|-------------------|---------------------|----------------|
|                                   | t2(Year,Distance, Habitat) | 0.93       | 25.00          | F           | 0.58              | <0.001              |                |
| Conductivity                      | te(Year,Distance)          | 9.08       | 10.18          | F           | 2.55              | =0.014              | 0.30           |
| pH                                | te(Year,Distance)          | 4.86       | 5.74           | F           | 3.23              | =0.01               | 0.22           |
| Turbidity                         | te(Year,Distance)          | 3.50       | 3.91           | F           | 2.30              | =0.06               | 0.11           |
| Dissolved Oxygen                  | te(Year,Distance)          | 7.62       | 8.48           | F           | 10.20             | <0.001              | 0.62           |
| Fishery yield                     | te(Year,Distance)          | 15.25      | 19.55          | F           | 6.53              | <0.001              | 0.70           |
| MEI                               | te(Year,Distance)          | 8.83       | 8.99           | F           | 16.05             | <0.001              | 0.71           |
| Mean Monthly Flow                 | te(Year,Distance)          | 8.81       | 10.12          | F           | 15.26             | <0.001              | 0.73           |
| Lowest Flow Recorded in the Year  | te(Year,Distance)          | 8.11       | 8.77           | F           | 34.24             | <0.001              | 0.84           |
| Highest Flow Recorded in the Year | te(Year,Distance)          | 9.81       | 11.25          | F           | 9.59              | <0.001              | 0.66           |
| Annual Rate of Flow Increase      | te(Year,Distance)          | 18.91      | 22.82          | F           | 5.59              | <0.001              | 0.70           |
| Length of the Wet Season          | te(Year,Distance)          | 25.82      | 28.30          | Chi.sq      | 482.00            | <0.001              | 0.51           |

**Table S5**

List of species recorded by Baited Remote Underwater Video (BRUV) in the Middle Xingu River. MaxN and relative MaxN values were provided for each year sampling and habitat, respectively. S total = Total number of species.

| Order, Family, Species                    | Years |      |      |      |      |      |      | Habitat |         |
|-------------------------------------------|-------|------|------|------|------|------|------|---------|---------|
|                                           | 2014  | 2015 | 2016 | 2017 | 2018 | 2019 | 2020 | Rapids  | Beaches |
| <b>Characiformes</b>                      |       |      |      |      |      |      |      |         |         |
| <b>Acestrorhynchidae</b>                  |       |      |      |      |      |      |      |         |         |
| <i>Acestrorhynchus falcatus</i>           | 0     | 0    | 0    | 0    | 0    | 1    | 0    | 0       | 0       |
| <b>Anostomidae</b>                        |       |      |      |      |      |      |      |         |         |
| <i>Anostomoides passionis</i>             | 15    | 21   | 16   | 5    | 4    | 7    | 5    | 0.003   | 0       |
| <i>Hypomasticus julii</i>                 | 75    | 42   | 34   | 75   | 26   | 4    | 29   | 0.014   | 0       |
| <i>Laemolyta fernandezii</i>              | 2     | 0    | 0    | 0    | 0    | 0    | 0    | 0       | 0       |
| <i>Laemolyta proxima</i>                  | 0     | 0    | 0    | 0    | 1    | 13   | 0    | 0.001   | 0       |
| <i>Leporellus vittatus</i>                | 1     | 1    | 0    | 0    | 0    | 0    | 0    | 0       | 0       |
| <i>Leporinus aff. fasciatus</i>           | 124   | 141  | 190  | 288  | 204  | 6    | 163  | 0.046   | 0.01    |
| <i>Leporinus brunneus</i>                 | 41    | 20   | 11   | 27   | 15   | 16   | 13   | 0.007   | 0       |
| <i>Leporinus desmotes</i>                 | 5     | 3    | 2    | 6    | 10   | 0    | 4    | 0.001   | 0       |
| <i>Leporinus friderici</i>                | 24    | 7    | 86   | 26   | 2    | 11   | 11   | 0.004   | 0       |
| <i>Leporinus gr. megalepis</i>            | 0     | 1    | 0    | 0    | 0    | 0    | 0    | 0       | 0       |
| <i>Leporinus maculatus</i>                | 169   | 172  | 39   | 242  | 87   | 151  | 142  | 0.044   | 0.01    |
| <i>Leporinus sp. 2</i>                    | 16    | 17   | 0    | 29   | 5    | 1    | 0    | 0.003   | 0       |
| <i>Leporinus tigrinus</i>                 | 55    | 22   | 42   | 22   | 21   | 122  | 54   | 0.013   | 0       |
| <i>Schizodon vittatus</i>                 | 1     | 1    | 0    | 2    | 0    | 0    | 0    | 0       | 0       |
| <b>Bryconidae</b>                         |       |      |      |      |      |      |      |         |         |
| <i>Brycon aff. pesu "adiposa hialina"</i> | 81    | 336  | 90   | 74   | 3    | 0    | 104  | 0.02    | 0.03    |
| <i>Brycon aff. pesu "adiposa preta"</i>   | 37    | 52   | 29   | 46   | 23   | 61   | 34   | 0.002   | 0.03    |
| <i>Brycon falcatus</i>                    | 0     | 0    | 0    | 7    | 3    | 44   | 3    | 0.001   | 0       |
| <b>Characidae</b>                         |       |      |      |      |      |      |      |         |         |
| <i>Astyanax bimaculatus</i>               | 0     | 0    | 55   | 0    | 0    | 0    | 0    | 0       | 0       |
| <i>Caiapobrycon sp.</i>                   | 0     | 12   | 0    | 65   | 0    | 0    | 0    | 0.001   | 0.01    |
| <i>Characidae sp. "pinta pedunculo"</i>   | 2065  | 728  | 220  | 40   | 65   | 0    | 0    | 0.128   | 0.05    |
| <i>Creagrutus spp.</i>                    | 140   | 577  | 245  | 20   | 0    | 18   | 0    | 0.016   | 0.08    |
| <i>Hemigrammus sp. "transparente"</i>     | 273   | 351  | 0    | 72   | 211  | 30   | 81   | 0.029   | 0.05    |
| <i>Hemigrammus spp.</i>                   | 0     | 0    | 0    | 0    | 0    | 62   | 0    | 0.003   | 0       |
| <i>Hyphessobrycon pulchripinnis</i>       | 0     | 0    | 0    | 0    | 0    | 18   | 0    | 0.001   | 0       |
| <i>Jupiaba aconthogaster</i>              | 0     | 0    | 0    | 0    | 0    | 28   | 0    | 0       | 0       |
| <i>Knodus heteresthes</i>                 | 0     | 0    | 0    | 0    | 0    | 10   | 0    | 0       | 0       |

| Order, Family, Species           | Years |      |      |      |      |      |      | Habitat |         |
|----------------------------------|-------|------|------|------|------|------|------|---------|---------|
|                                  | 2014  | 2015 | 2016 | 2017 | 2018 | 2019 | 2020 | Rapids  | Beaches |
| <i>Moenkhausia celibela</i>      | 208   | 963  | 10   | 0    | 0    | 72   | 0    | 0.054   | 0.02    |
| <i>Moenkhausia gr. lepidura</i>  | 352   | 499  | 321  | 216  | 267  | 71   | 568  | 0.083   | 0.07    |
| <i>Moenkhausia heikoi</i>        | 287   | 192  | 120  | 35   | 20   | 0    | 0    | 0.031   | 0       |
| <i>Moenkhausia xinguensis</i>    | 1233  | 976  | 624  | 324  | 460  | 0    | 113  | 0.138   | 0.1     |
| <b>Crenuchidae</b>               |       |      |      |      |      |      |      |         |         |
| <i>Characidium gr. fasciatum</i> | 8     | 1    | 0    | 0    | 0    | 0    | 0    | 0       | 0       |
| <b>Ctenolucidae</b>              |       |      |      |      |      |      |      |         |         |
| <i>Boulengerella cuvieri</i>     | 46    | 69   | 20   | 50   | 22   | 11   | 19   | 0.006   | 0.01    |
| <b>Cynodontidae</b>              |       |      |      |      |      |      |      |         |         |
| <i>Hydrolycus armatus</i>        | 5     | 4    | 0    | 0    | 0    | 1    | 0    | 0       | 0       |
| <i>Hydrolycus tatauaia</i>       | 7     | 1    | 0    | 0    | 0    | 0    | 0    | 0       | 0       |
| <b>Hemiodontidae</b>             |       |      |      |      |      |      |      |         |         |
| <i>Argonectes robertsi</i>       | 3     | 5    | 2    | 5    | 11   | 3    | 4    | 0       | 0       |
| <i>Bivibranchia velox</i>        | 1     | 0    | 0    | 0    | 0    | 0    | 0    | 0       | 0       |
| <i>Hemiodus tocantinensis</i>    | 0     | 0    | 0    | 0    | 0    | 81   | 0    | 0.002   | 0       |
| <i>Hemiodus unimaculatus</i>     | 30    | 8    | 6    | 17   | 23   | 28   | 18   | 0.004   | 0       |
| <i>Hemiodus vorderwinckleri</i>  | 95    | 94   | 51   | 158  | 105  | 3    | 56   | 0.025   | 0       |
| <b>Iguanodectidae</b>            |       |      |      |      |      |      |      |         |         |
| <i>Bryconops alburnoides</i>     | 671   | 1589 | 737  | 253  | 280  | 552  | 144  | 0.106   | 0.25    |
| <i>Bryconops caudomaculatus</i>  | 0     | 7    | 0    | 0    | 0    | 13   | 0    | 0       | 0       |
| <i>Bryconops cf. affinis</i>     | 0     | 0    | 0    | 0    | 0    | 0    | 40   | 0       | 0.01    |
| <b>Prochilodontidae</b>          |       |      |      |      |      |      |      |         |         |
| <i>Prochilodus nigricans</i>     | 14    | 36   | 20   | 31   | 15   | 2    | 8    | 0.003   | 0       |
| <i>Semaprochilodus brama</i>     | 4     | 0    | 30   | 16   | 15   | 32   | 12   | 0.002   | 0.01    |
| <b>Serrasalminidae</b>           |       |      |      |      |      |      |      |         |         |
| <i>Acnodon normani</i>           | 87    | 65   | 57   | 41   | 76   | 70   | 40   | 0.011   | 0.03    |
| <i>Myleus setiger</i>            | 546   | 272  | 398  | 160  | 168  | 95   | 99   | 0.045   | 0.1     |
| <i>Myloplus arnoldi</i>          | 3     | 4    | 5    | 8    | 6    | 7    | 70   | 0.003   | 0       |
| <i>Myloplus rhomboidalis</i>     | 14    | 11   | 6    | 0    | 0    | 1    | 0    | 0.001   | 0       |
| <i>Myloplus rubripinnis</i>      | 0     | 0    | 0    | 1    | 0    | 0    | 0    | 0       | 0       |
| <i>Myloplus schomburgkii</i>     | 14    | 25   | 41   | 41   | 21   | 22   | 59   | 0.008   | 0       |
| <i>Serrasalmus manuely</i>       | 17    | 7    | 27   | 1    | 0    | 3    | 0    | 0.001   | 0       |
| <i>Serrasalmus rhombeus</i>      | 30    | 34   | 190  | 164  | 102  | 47   | 73   | 0.014   | 0       |
| <i>Tometes sp.</i>               | 83    | 177  | 52   | 236  | 195  | 1    | 200  | 0.032   | 0.03    |
| <b>Triporthidae</b>              |       |      |      |      |      |      |      |         |         |
| <i>Agoniatas halecinus</i>       | 0     | 2    | 10   | 0    | 0    | 1    | 0    | 0.001   | 0       |
| <i>Triporthes albus</i>          | 0     | 0    | 8    | 3    | 1    | 0    | 3    | 0       | 0       |
| <b>Gymnotiformes</b>             |       |      |      |      |      |      |      |         |         |
| <b>Gymnotidae</b>                |       |      |      |      |      |      |      |         |         |
| <i>Electrophorus electricus</i>  | 0     | 1    | 0    | 1    | 1    | 0    | 0    | 0       | 0       |
| <b>Myliobatiformes</b>           |       |      |      |      |      |      |      |         |         |
| <b>Potamotrygonidae</b>          |       |      |      |      |      |      |      |         |         |

| Order, Family, Species             | Years |      |      |      |      |      |      | Habitat |         |
|------------------------------------|-------|------|------|------|------|------|------|---------|---------|
|                                    | 2014  | 2015 | 2016 | 2017 | 2018 | 2019 | 2020 | Rapids  | Beaches |
| <i>Paratrygon aireba</i>           | 0     | 0    | 0    | 0    | 0    | 1    | 0    | 0       | 0       |
| <i>Potamotrygon leopoldi</i>       | 10    | 12   | 15   | 14   | 9    | 11   | 7    | 0.003   | 0       |
| <i>Potamotrygon motoro</i>         | 0     | 0    | 0    | 0    | 0    | 1    | 0    | 0       | 0       |
| <i>Potamotrygon orbignyi</i>       | 4     | 3    | 2    | 6    | 1    | 0    | 1    | 0       | 0       |
| Perciformes                        |       |      |      |      |      |      |      |         |         |
| Cichlidae                          |       |      |      |      |      |      |      |         |         |
| <i>Apistogramma geophyra</i>       | 0     | 0    | 0    | 0    | 0    | 0    | 4    | 0       | 0       |
| <i>Cichla melaniae</i>             | 15    | 36   | 26   | 96   | 17   | 24   | 21   | 0.006   | 0       |
| <i>Cichla monoculus</i>            | 0     | 1    | 0    | 0    | 0    | 0    | 0    | 0       | 0       |
| <i>Cichla pinima</i>               | 5     | 2    | 15   | 16   | 15   | 5    | 23   | 0.003   | 0       |
| <i>Crenicichla gr. lugubris</i>    | 34    | 30   | 31   | 66   | 29   | 36   | 31   | 0.011   | 0       |
| <i>Crenicichla percna</i>          | 4     | 3    | 0    | 0    | 0    | 0    | 0    | 0       | 0       |
| <i>Geophagus altifrons</i>         | 19    | 18   | 45   | 40   | 54   | 2    | 45   | 0.007   | 0.01    |
| <i>Geophagus argyrostictus</i>     | 25    | 38   | 136  | 84   | 104  | 9    | 66   | 0.021   | 0       |
| <i>Retroculus xinguensis</i>       | 3     | 0    | 2    | 3    | 31   | 0    | 11   | 0.001   | 0       |
| <i>Satanoperca sp.</i>             | 5     | 0    | 0    | 0    | 0    | 0    | 0    | 0       | 0       |
| <i>Teleocichla centrarchus</i>     | 0     | 1    | 4    | 0    | 0    | 0    | 0    | 0       | 0       |
| <i>Teleocichla cinderella</i>      | 78    | 120  | 172  | 98   | 151  | 127  | 140  | 0.03    | 0.03    |
| <i>Teleocichla geophyrogramma</i>  | 1     | 0    | 27   | 0    | 0    | 0    | 0    | 0.001   | 0       |
| <i>Teleocichla sp. "preta"</i>     | 1     | 1    | 3    | 0    | 0    | 1    | 1    | 0       | 0       |
| Sciaenidae                         |       |      |      |      |      |      |      |         |         |
| <i>Pachyurus junki</i>             | 0     | 1    | 0    | 1    | 0    | 0    | 1    | 0       | 0       |
| <i>Plagioscion squamosissimus</i>  | 0     | 0    | 1    | 0    | 0    | 0    | 0    | 0       | 0       |
| Siluriformes                       |       |      |      |      |      |      |      |         |         |
| Dorididae                          |       |      |      |      |      |      |      |         |         |
| <i>Leptodoras hasemani</i>         | 0     | 0    | 0    | 0    | 0    | 1    | 0    | 0       | 0       |
| Loricariidae                       |       |      |      |      |      |      |      |         |         |
| <i>Baryancistrus sp. "verde"</i>   | 0     | 0    | 0    | 5    | 0    | 2    | 0    | 0       | 0       |
| <i>Baryancistrus spp.</i>          | 0     | 0    | 0    | 10   | 0    | 0    | 2    | 0.001   | 0       |
| <i>Baryancistrus xanthellus</i>    | 5     | 6    | 11   | 2    | 20   | 2    | 4    | 0.002   | 0       |
| <i>Hopliancistrus sp. "pinta"</i>  | 1     | 0    | 0    | 0    | 0    | 1    | 0    | 0       | 0       |
| <i>Hypostomus hemicochliodon</i>   | 0     | 0    | 0    | 0    | 0    | 0    | 3    | 0       | 0       |
| <i>Loricaria birindelli</i>        | 0     | 1    | 0    | 0    | 0    | 0    | 0    | 0       | 0       |
| <i>Peckoltia sabaji</i>            | 1     | 1    | 0    | 0    | 0    | 0    | 0    | 0       | 0       |
| <i>Spectracanthicus zuanoni</i>    | 1     | 0    | 0    | 0    | 0    | 0    | 0    | 0       | 0       |
| Pimelodidae                        |       |      |      |      |      |      |      |         |         |
| <i>Phractocephalus hemioliopus</i> | 6     | 1    | 0    | 0    | 0    | 0    | 1    | 0       | 0       |
| <i>Pimelodus blochii</i>           | 0     | 0    | 0    | 5    | 0    | 0    | 0    | 0       | 0       |
| <i>Pimelodus ornatus</i>           | 1     | 0    | 0    | 0    | 0    | 0    | 0    | 0       | 0       |
| <i>Pinirampus pirinampu</i>        | 1     | 2    | 4    | 2    | 2    | 0    | 4    | 0.001   | 0       |
| <i>Pseudoplatystoma punctifer</i>  | 1     | 4    | 1    | 3    | 5    | 0    | 2    | 0.001   | 0       |
| <i>Brachyplatystoma</i>            | 0     | 0    | 0    | 0    | 0    | 1    | 0    | 0       | 0       |



| Order, Family, Species            | Years |      |      |      |      |      |      | Habitat |         |
|-----------------------------------|-------|------|------|------|------|------|------|---------|---------|
|                                   | 2014  | 2015 | 2016 | 2017 | 2018 | 2019 | 2020 | Rapids  | Beaches |
| <i>filamentosum</i>               |       |      |      |      |      |      |      |         |         |
| <i>Pseudoplatystoma fasciatum</i> | 0     | 0    | 0    | 0    | 0    | 3    | 0    | 0       | 0       |
| Trichomycteridae                  |       |      |      |      |      |      |      |         |         |
| <i>Henonemus sp.</i>              | 0     | 0    | 0    | 0    | 0    | 0    | 5    | 0       | 0       |
| Symbranchiformes                  |       |      |      |      |      |      |      |         |         |
| Symbranchidae                     |       |      |      |      |      |      |      |         |         |
| <i>Symbranchus marmoratus</i>     | 0     | 0    | 1    | 0    | 0    | 0    | 0    | 0       | 0       |
| Tetraodontiformes                 |       |      |      |      |      |      |      |         |         |
| Tetraodontidae                    |       |      |      |      |      |      |      |         |         |
| <i>Colomesus asellus</i>          | 1     | 3    | 5    | 21   | 2    | 0    | 8    | 0       | 0       |
| <b>S total</b>                    | 62    | 62   | 52   | 54   | 46   | 55   | 49   | 52      | 20      |

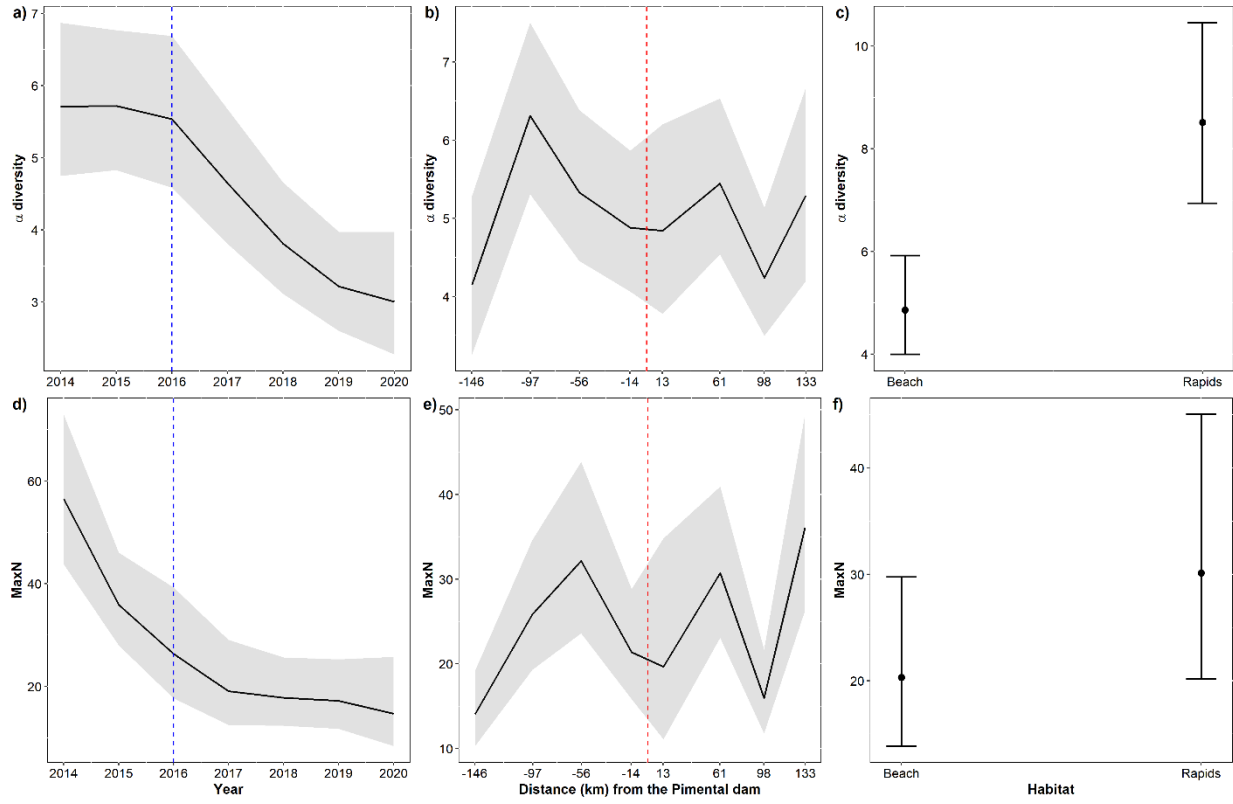

Fig. S1. Marginal effect of the year (a, d), distance to the Pimental dam (b, e), and habitat (c, f) on  $\alpha$ -diversity (richness) and MaxN (proxy for abundance). Black lines are the average predictions and the gray ribbons are the standard errors. Vertical blue lines indicate the year when the Belo Monte project started its operations. Horizontal red lines show the location of the Pimental dam.

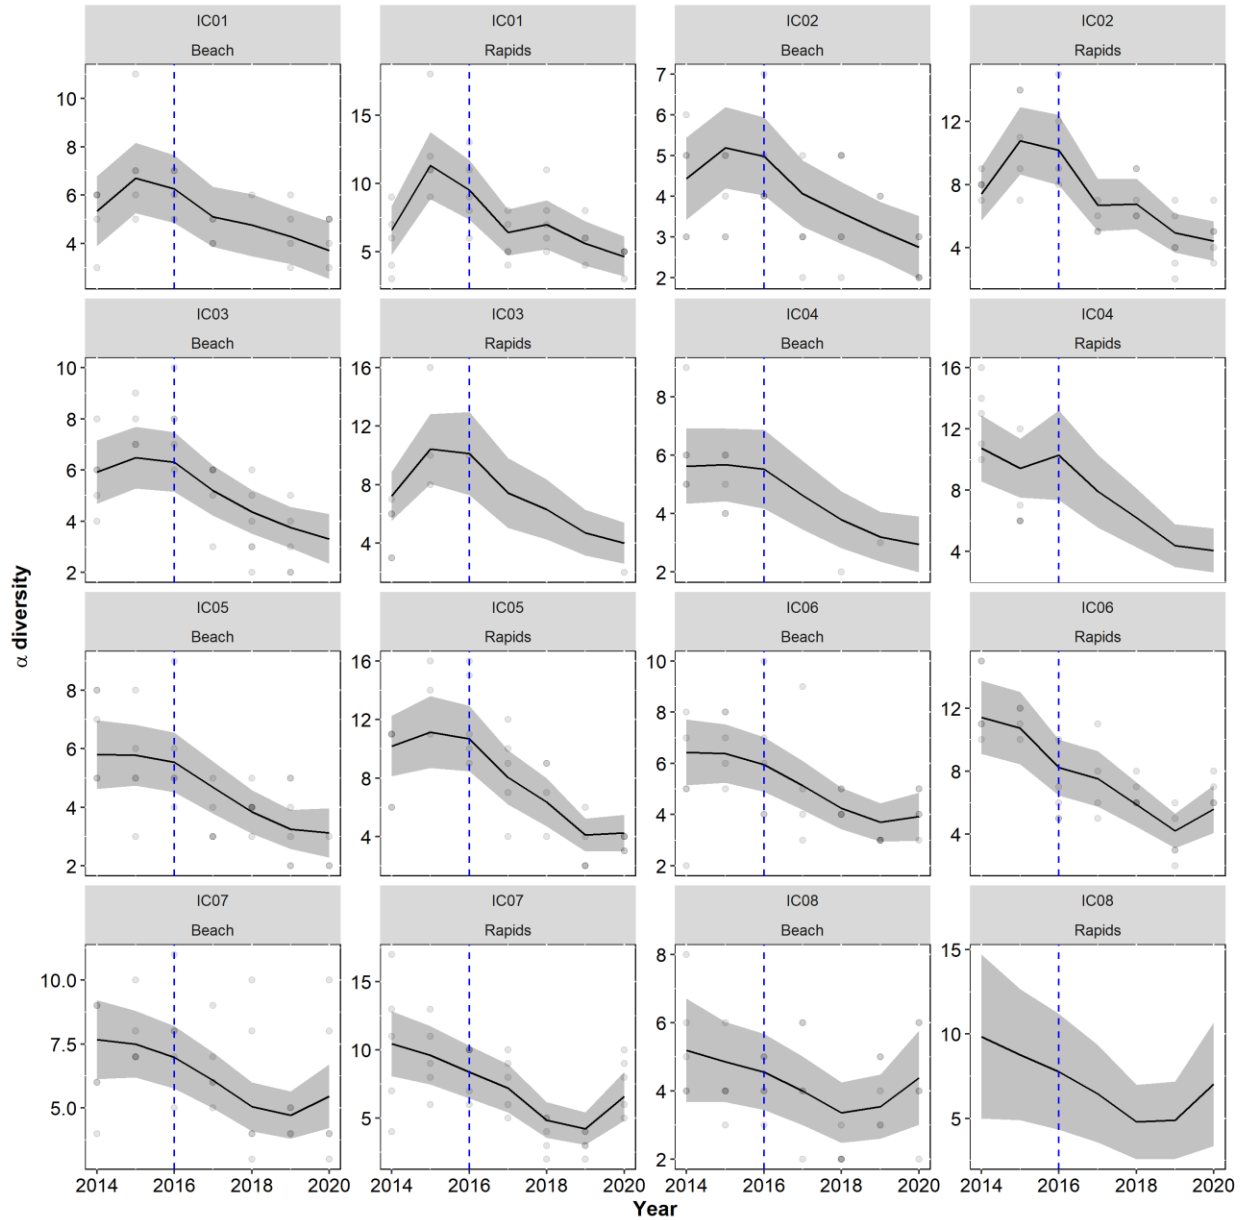

Fig. S2. Variation in  $\alpha$ -diversity (richness) across years, sampling sites, and habitats. Black lines are the average predictions of our Hierarchical Generalized Additive Model (HGAM) and the gray ribbons are the standard errors. Vertical blue lines indicate the year when the Belo Monte project started its operations. [IC01 to IC02 represent upstream sections not directly affected by reservoir filling; IC03 to IC04 represent sections directly affected by reservoir filling; IC05 to IC06 are situated in the reduced flow sector, and IC07 to IC08 are located in downstream sections unaffected by the reduced flow sector.](#)

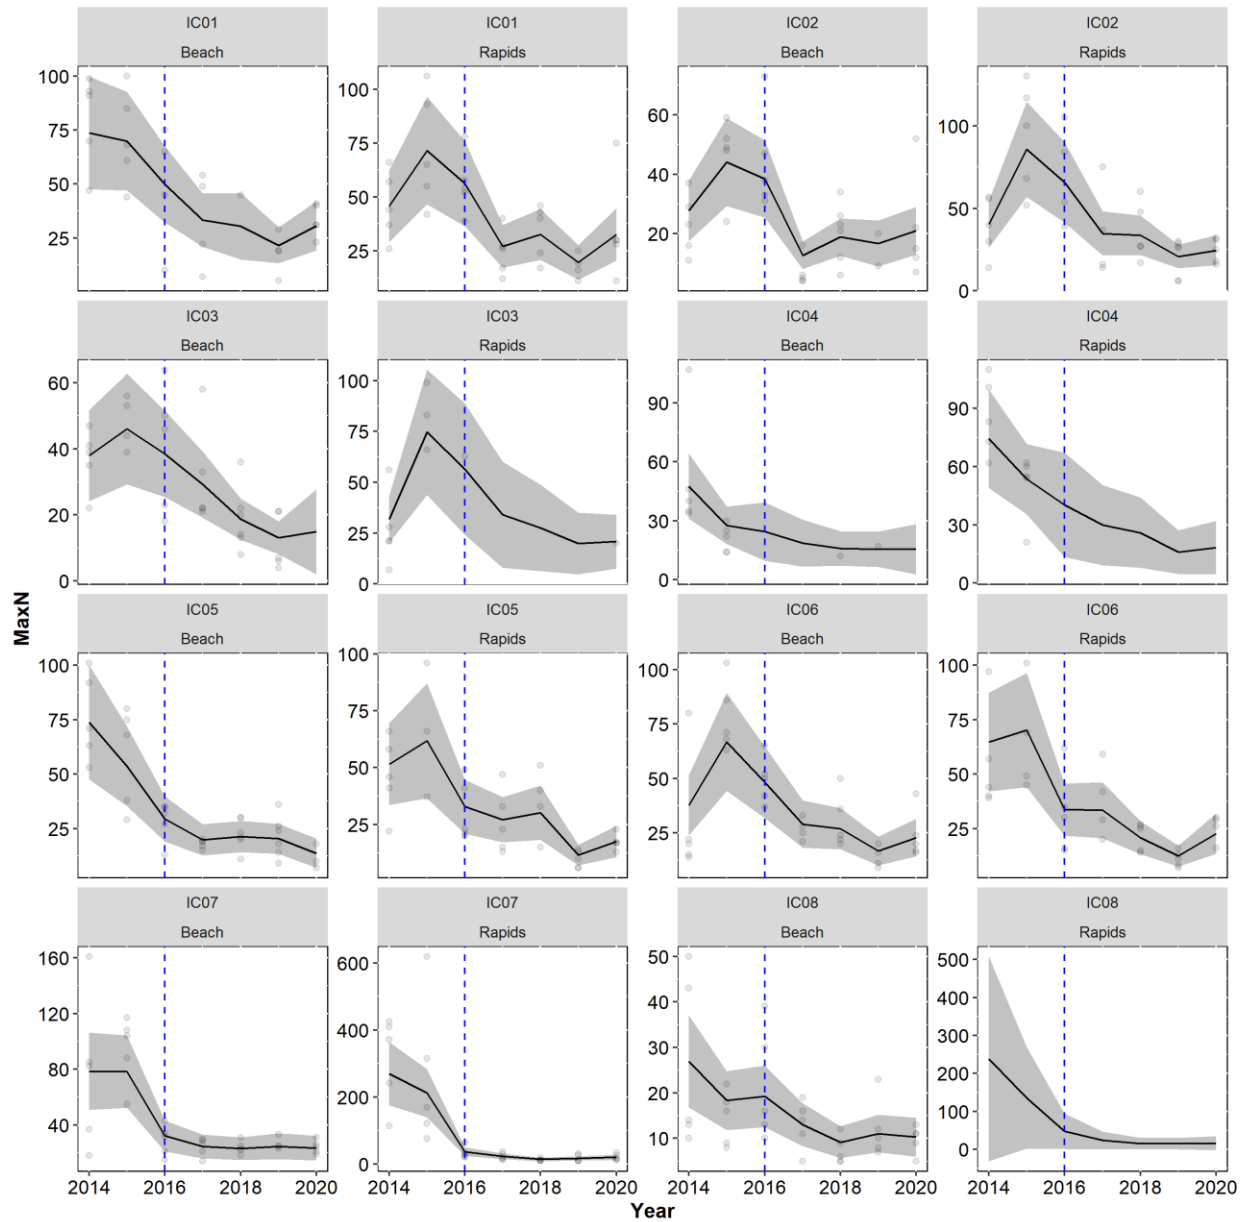

Fig. S3. Variation in MaxN (proxy for abundance) across years, sampling sites, and habitats. Black lines are the average predictions of our Hierarchical Generalized Additive Model (HGAM) and the gray ribbons are the standard errors. Vertical blue lines indicate the year when the Belo Monte project started its operations. [IC01 to IC02 represent upstream sections not directly affected by reservoir filling; IC03 to IC04 represent sections directly affected by reservoir filling; IC05 to IC06 are situated in the reduced flow sector, and IC07 to IC08 are located in downstream sections unaffected by the reduced flow sector.](#)

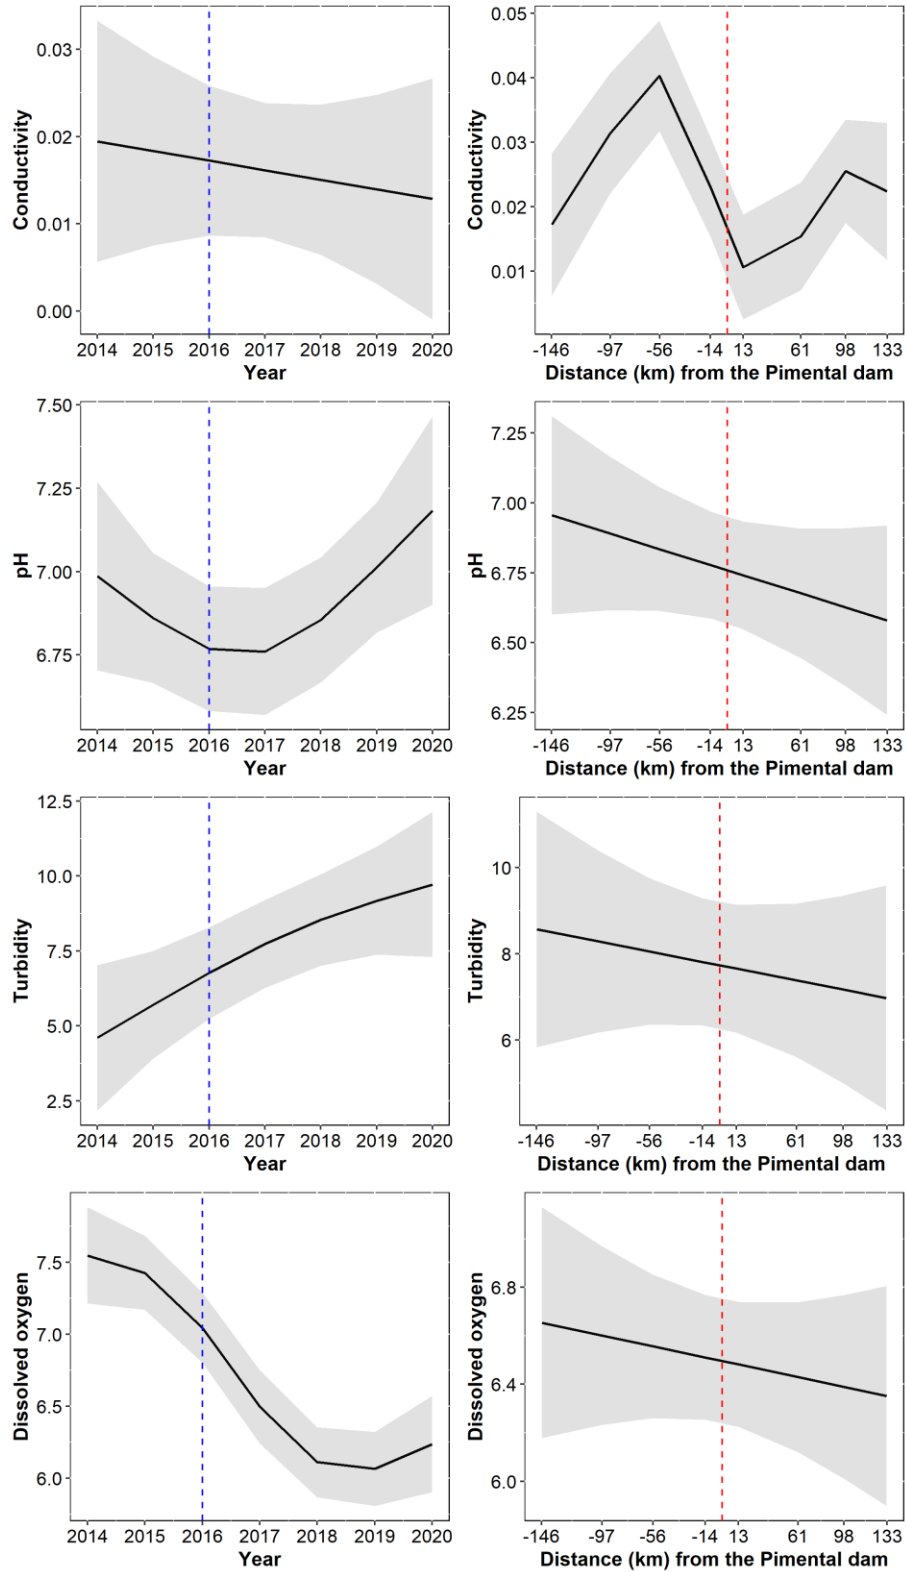

Fig. S4. Marginal effect of year and distance from the Pimental dam on conductivity, pH, turbidity, and dissolved oxygen. Black lines are the average predictions of our Hierarchical

Generalized Additive models (HGAM) and the gray ribbons are the standard errors. Vertical blue lines indicate the year when the Belo Monte project started its operations. Horizontal red lines show the location of the Pimental dam.

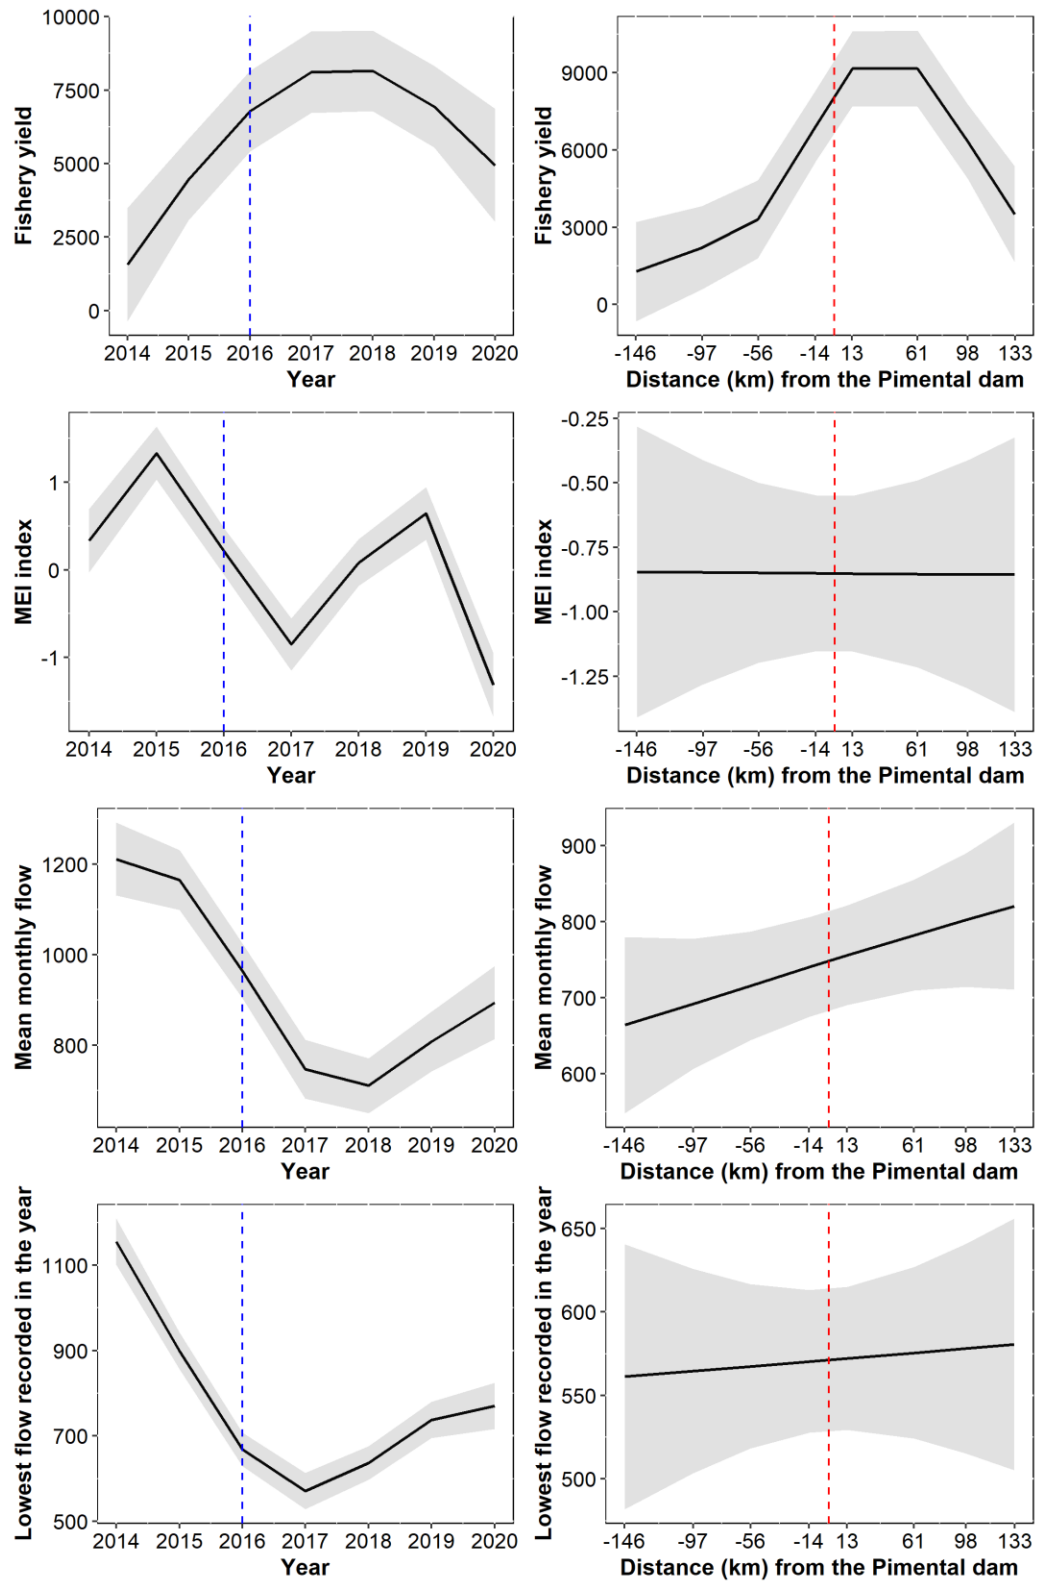

Fig. S5. Marginal effect of year and distance from the Pimental dam on fishery yield, MEI, mean monthly flow, and lowest flow recorded in the year. Black lines are the average predictions of

our Hierarchical Generalized Additive models (HGAM) and the gray ribbons are the standard errors. Vertical blue lines indicate the year when the Belo Monte project started its operations. Horizontal red lines show the location of the Pimental dam.



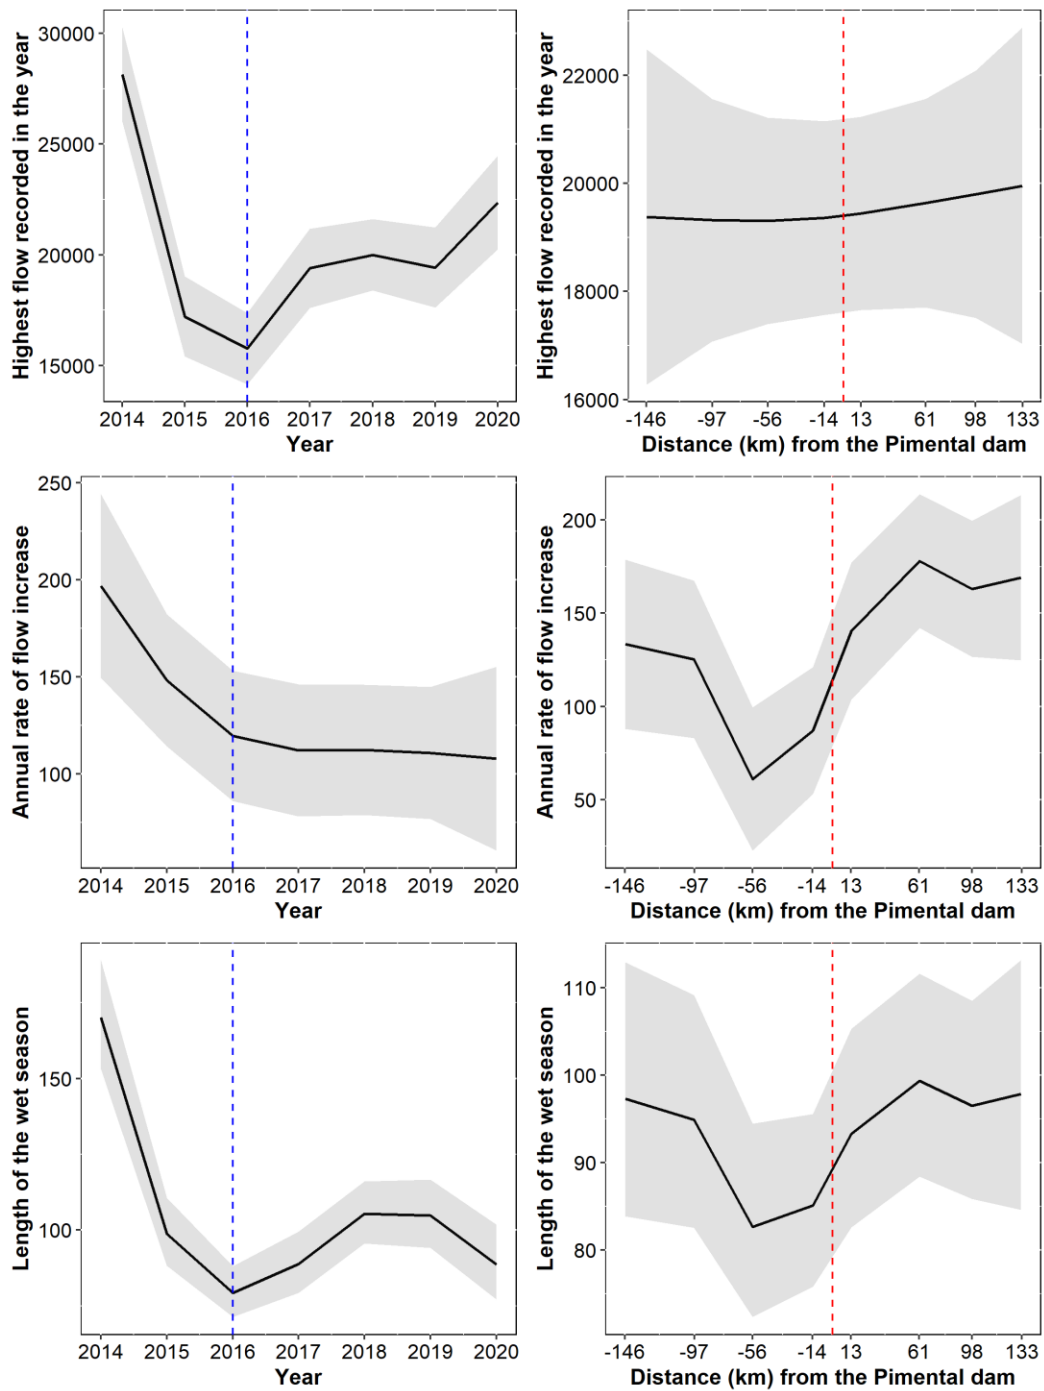

Fig. S6. Marginal effect of year and distance from the Pimental dam on the highest flow recorded in the year, annual rate of flow increase, and length of the wet season. Black lines are the average predictions of our Hierarchical Generalized Additive models (HGAM) and the gray ribbons are

the standard errors. Vertical blue lines indicate the year when the Belo Monte project started its operations. Horizontal red lines show the location of the Pimental dam.

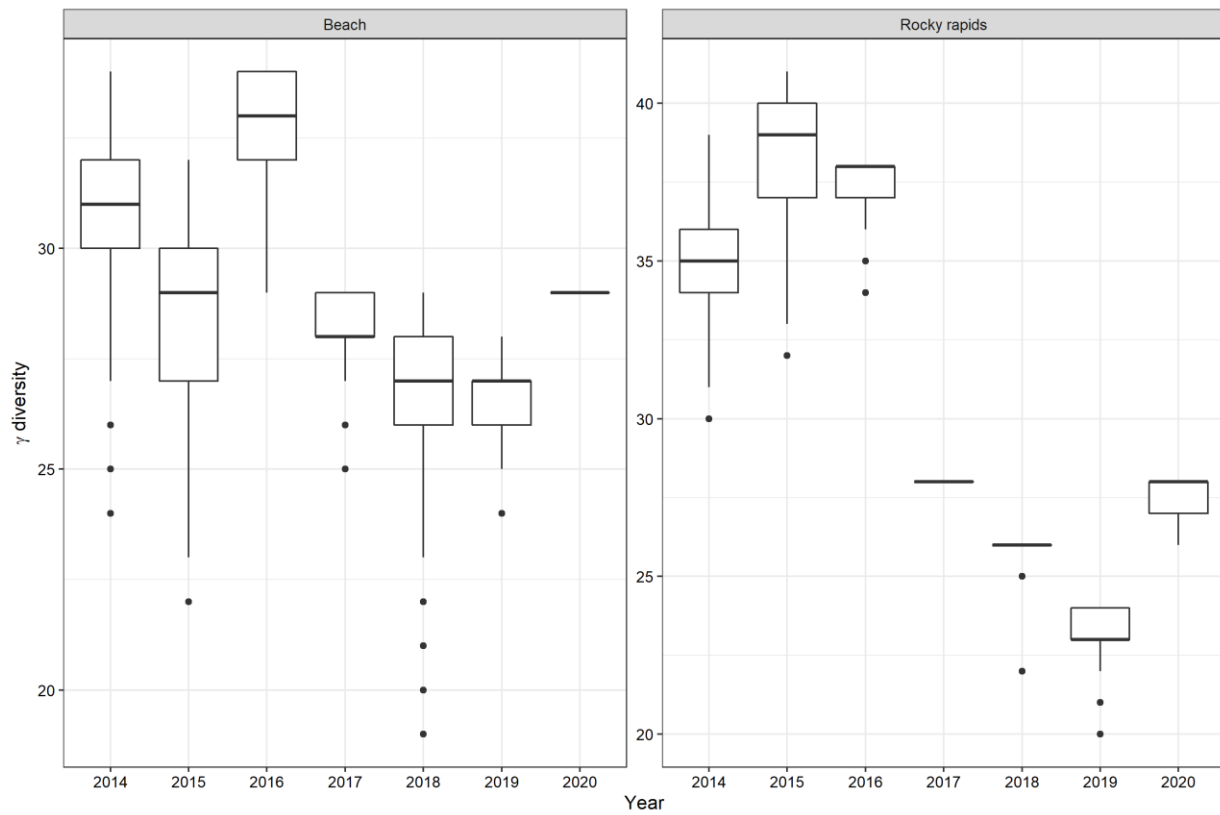

Fig. S7. Variation in  $\gamma$ -diversity across habitats (Beach and rocky rapids) and during the study period. To control for different sample sizes between the years, we conducted a bootstrap approach where we compared the  $\gamma$ -diversity between years using a fixed number of BRUV systems (year with the lowest number of BRUV systems deployed). The bootstrap approach was carried out with 1000 computer iterations.
